# Supplementary material for: Storyboarding HIV Infected Young People’s Adherence to Antiretroviral Therapy in Lower to Upper Middle-Income Countries: A New-Materialist Qualitative Evidence Synthesis
Source: Preprints.org preprint supplement (doi:10.20944/preprints202206.0296.v1), 2022-06-21
Supplement: Supplementary file 1 [file supplementary]

## Supplementary File 1: ENTREQ Reporting Guideline

| No | Item                       | Guide and description                                                                                                                                                                                                                                                                                                                                                                                             | Page No. in manuscript    |
|----|----------------------------|-------------------------------------------------------------------------------------------------------------------------------------------------------------------------------------------------------------------------------------------------------------------------------------------------------------------------------------------------------------------------------------------------------------------|---------------------------|
| 1  | Aim                        | State the research questions the synthesis addresses.                                                                                                                                                                                                                                                                                                                                                             | 8                         |
| 2  | Synthesis methodology      | Identify the synthesis methodology or theoretical framework which underpins the synthesis and describe the rationale for choice of methodology (e.g., <i>meta-ethnography, thematic synthesis, critical interpretive synthesis, grounded theory synthesis, realist synthesis, meta-aggregation, meta-study, framework synthesis</i> ).                                                                            | 9                         |
| 3  | Approach to searching      | Indicate whether the search was pre-planned ( <i>comprehensive search strategies to seek all available studies</i> ) or iterative ( <i>to seek all available concepts until they theoretical saturation is achieved</i> ).                                                                                                                                                                                        | 10-12                     |
| 4  | Inclusion criteria         | Specify the inclusion/exclusion criteria (e.g., <i>in terms of population, language, year limits, type of publication, study type</i> ).                                                                                                                                                                                                                                                                          | 12                        |
| 5  | Data sources               | Describe the information sources used (e.g., <i>electronic databases (MEDLINE, EMBASE, CINAHL, psycINFO, Econlit), grey literature databases (digital thesis, policy reports), relevant organisational websites, experts, information specialists, generic web searches (Google Scholar) hand searching, reference lists</i> ) and when the searches conducted; provide the rationale for using the data sources. | 12                        |
| 6  | Electronic Search strategy | Describe the literature search (e.g., <i>provide electronic search strategies with population terms, clinical or health topic terms, experiential or social phenomena related terms, filters for qualitative research, and search limits</i> ).                                                                                                                                                                   | Supplement<br>ary File S2 |
| 7  | Study screening methods    | Describe the process of study screening and sifting (e.g., <i>title, abstract and full text review, number of independent reviewers who screened studies</i> ).                                                                                                                                                                                                                                                   | 12-13                     |
| 8  | Study characteristics      | Present the characteristics of the included studies (e.g., <i>year of publication, country, population, number of participants, data collection, methodology, analysis, research questions</i> ).                                                                                                                                                                                                                 | Supplement<br>ary File S3 |
| 9  | Study selection results    | Identify the number of studies screened and provide reasons for study exclusion (e.g., <i>for comprehensive searching, provide numbers of studies screened and reasons for exclusion indicated in a figure/flowchart; for iterative searching describe reasons for study exclusion and inclusion based on modifications to the research question and/or contribution to theory development</i> ).                 | 16-17                     |
| 10 | Rationale for appraisal    | Describe the rationale and approach used to appraise the included studies or selected findings (e.g., <i>assessment of conduct (validity and robustness)</i> ).                                                                                                                                                                                                                                                   | 13                        |

|           |                      |                                                                                                                                                                                                                                                                                                     |                           |
|-----------|----------------------|-----------------------------------------------------------------------------------------------------------------------------------------------------------------------------------------------------------------------------------------------------------------------------------------------------|---------------------------|
|           |                      | <i>assessment of reporting (transparency), assessment of content and utility of the findings).</i>                                                                                                                                                                                                  |                           |
| <b>11</b> | Appraisal items      | State the tools, frameworks and criteria used to appraise the studies or selected findings (e.g. <i>Existing tools: CASP, QARI, COREQ, Mays and Pope [25]; reviewer developed tools; describe the domains assessed: research team, study design, data analysis and interpretations, reporting).</i> | 13                        |
| <b>12</b> | Appraisal process    | Indicate whether the appraisal was conducted independently by more than one reviewer and if consensus was required.                                                                                                                                                                                 | 13                        |
| <b>13</b> | Appraisal results    | Present results of the quality assessment and indicate which articles, if any, were weighted/excluded based on the assessment and give the rationale.                                                                                                                                               | Supplement<br>ary File S4 |
| <b>14</b> | Data extraction      | Indicate which sections of the primary studies were analysed and how were the data extracted from the primary studies? (e.g., <i>all text under the headings "results /conclusions" were extracted electronically and entered into a computer software).</i>                                        | 13                        |
| <b>15</b> | Software             | State the computer software used, if any.                                                                                                                                                                                                                                                           | 13                        |
| <b>16</b> | Number of reviewers  | Identify who was involved in coding and analysis.                                                                                                                                                                                                                                                   | 13                        |
| <b>17</b> | Coding               | Describe the process for coding of data (e.g., <i>line by line coding to search for concepts).</i>                                                                                                                                                                                                  | 13-16                     |
| <b>18</b> | Study comparison     | Describe how were comparisons made within and across studies (e.g., <i>subsequent studies were coded into pre-existing concepts, and new concepts were created when deemed necessary).</i>                                                                                                          | 13-16                     |
| <b>19</b> | Derivation of themes | Explain whether the process of deriving the themes or constructs was inductive or deductive.                                                                                                                                                                                                        | 13-16                     |
| <b>20</b> | Quotations           | Provide quotations from the primary studies to illustrate themes/constructs and identify whether the quotations were participant quotations of the author's interpretation.                                                                                                                         | 20-30                     |
| <b>21</b> | Synthesis output     | Present rich, compelling, and useful results that go beyond a summary of the primary studies (e.g., <i>new interpretation, models of evidence, conceptual models, analytical framework, development of a new theory or construct).</i>                                                              | 20-34                     |

## Supplementary File 2: Systematic review search strategy

### Medline PubMed

| Search | Query                                                                                                                                                                                                                                                                                                                                                                                                                                                                                                                                                                                                                                                                                                                                                                                                                                                                                                                                                                                                                                                                                                                                                                                                                                                                                                                                                                                                                                                                                                                                                                                                                                                                                                                                                                                                                                                                                                                                                                                                                                                                                                                                                                 |
|--------|-----------------------------------------------------------------------------------------------------------------------------------------------------------------------------------------------------------------------------------------------------------------------------------------------------------------------------------------------------------------------------------------------------------------------------------------------------------------------------------------------------------------------------------------------------------------------------------------------------------------------------------------------------------------------------------------------------------------------------------------------------------------------------------------------------------------------------------------------------------------------------------------------------------------------------------------------------------------------------------------------------------------------------------------------------------------------------------------------------------------------------------------------------------------------------------------------------------------------------------------------------------------------------------------------------------------------------------------------------------------------------------------------------------------------------------------------------------------------------------------------------------------------------------------------------------------------------------------------------------------------------------------------------------------------------------------------------------------------------------------------------------------------------------------------------------------------------------------------------------------------------------------------------------------------------------------------------------------------------------------------------------------------------------------------------------------------------------------------------------------------------------------------------------------------|
| #21    | Search (#29 AND #8 AND #12 AND #17 AND #21)                                                                                                                                                                                                                                                                                                                                                                                                                                                                                                                                                                                                                                                                                                                                                                                                                                                                                                                                                                                                                                                                                                                                                                                                                                                                                                                                                                                                                                                                                                                                                                                                                                                                                                                                                                                                                                                                                                                                                                                                                                                                                                                           |
| #20    | Search (((("vertical transmission" OR "vertical HIV transmission" OR "perinatal transmission" OR "perinatal HIV transmission" OR "vertical infection" OR "perinatal infection" OR "congenital infection" OR "vertical transfer" OR "perinatal transfer" OR "perinatal infection")))) OR "Infectious Disease Transmission, Vertical"[Mesh]                                                                                                                                                                                                                                                                                                                                                                                                                                                                                                                                                                                                                                                                                                                                                                                                                                                                                                                                                                                                                                                                                                                                                                                                                                                                                                                                                                                                                                                                                                                                                                                                                                                                                                                                                                                                                             |
| #19    | Search (#17 OR #18)                                                                                                                                                                                                                                                                                                                                                                                                                                                                                                                                                                                                                                                                                                                                                                                                                                                                                                                                                                                                                                                                                                                                                                                                                                                                                                                                                                                                                                                                                                                                                                                                                                                                                                                                                                                                                                                                                                                                                                                                                                                                                                                                                   |
| #18    | Search (adolescent* OR "young adult*" OR teenager* OR teens OR "high school" OR "secondary school" OR student*)                                                                                                                                                                                                                                                                                                                                                                                                                                                                                                                                                                                                                                                                                                                                                                                                                                                                                                                                                                                                                                                                                                                                                                                                                                                                                                                                                                                                                                                                                                                                                                                                                                                                                                                                                                                                                                                                                                                                                                                                                                                       |
| #17    | Search ("Adolescent"[Mesh] OR "Young Adult"[Mesh])                                                                                                                                                                                                                                                                                                                                                                                                                                                                                                                                                                                                                                                                                                                                                                                                                                                                                                                                                                                                                                                                                                                                                                                                                                                                                                                                                                                                                                                                                                                                                                                                                                                                                                                                                                                                                                                                                                                                                                                                                                                                                                                    |
| #16    | Search (#12 OR #13 OR #14 OR #15)                                                                                                                                                                                                                                                                                                                                                                                                                                                                                                                                                                                                                                                                                                                                                                                                                                                                                                                                                                                                                                                                                                                                                                                                                                                                                                                                                                                                                                                                                                                                                                                                                                                                                                                                                                                                                                                                                                                                                                                                                                                                                                                                     |
| #15    | Search ("developing country"[tw] OR "developing countries"[tw] OR "developing nation"[tw] OR "developing nations"[tw] OR "developing population"[tw] OR "developing populations"[tw] OR "developing world"[tw] OR "less developed country"[tw] OR "less developed countries"[tw] OR "less developed nation"[tw] OR "less developed nations"[tw] OR "less developed population"[tw] OR "less developed populations"[tw] OR "less developed world"[tw] OR "lesser developed country"[tw] OR "lesser developed countries"[tw] OR "lesser developed nation"[tw] OR "lesser developed nations"[tw] OR "lesser developed population"[tw] OR "lesser developed populations"[tw] OR "lesser developed world"[tw] OR "under developed country"[tw] OR "under developed countries"[tw] OR "under developed nation"[tw] OR "under developed nations"[tw] OR "under developed population"[tw] OR "under developed populations"[tw] OR "under developed world"[tw] OR "underdeveloped country"[tw] OR "underdeveloped countries"[tw] OR "underdeveloped nation"[tw] OR "underdeveloped nations"[tw] OR "underdeveloped population"[tw] OR "underdeveloped populations"[tw] OR "underdeveloped world"[tw] OR "middle income country"[tw] OR "middle income countries"[tw] OR "middle income nation"[tw] OR "middle income nations"[tw] OR "middle income population"[tw] OR "middle income populations"[tw] OR "low income country"[tw] OR "low income countries"[tw] OR "low income nation"[tw] OR "low income nations"[tw] OR "low income population"[tw] OR "low income populations"[tw] OR "lower income country"[tw] OR "lower income countries"[tw] OR "lower income nation"[tw] OR "lower income nations"[tw] OR "lower income population"[tw] OR "lower income populations"[tw] OR "underserved country"[tw] OR "underserved countries"[tw] OR "underserved nation"[tw] OR "underserved nations"[tw] OR "underserved population"[tw] OR "underserved populations"[tw] OR "underserved world"[tw] OR "under served country"[tw] OR "under served countries"[tw] OR "under served nation"[tw] OR "under served nations"[tw] OR "under served population"[tw] OR "under served |

| Search | Query                                                                                                                                                                                                                                                                                                                                                                                                                                                                                                                                                                                                                                                                                                                                                                                                                                                                                                                                                                                                                                                                                                                                                                                                                                                                                                                                                                                                                                                                                                                                                                                                                                                                                                                                                                                                                                                                                                                                                                                                                                                                                                                       |
|--------|-----------------------------------------------------------------------------------------------------------------------------------------------------------------------------------------------------------------------------------------------------------------------------------------------------------------------------------------------------------------------------------------------------------------------------------------------------------------------------------------------------------------------------------------------------------------------------------------------------------------------------------------------------------------------------------------------------------------------------------------------------------------------------------------------------------------------------------------------------------------------------------------------------------------------------------------------------------------------------------------------------------------------------------------------------------------------------------------------------------------------------------------------------------------------------------------------------------------------------------------------------------------------------------------------------------------------------------------------------------------------------------------------------------------------------------------------------------------------------------------------------------------------------------------------------------------------------------------------------------------------------------------------------------------------------------------------------------------------------------------------------------------------------------------------------------------------------------------------------------------------------------------------------------------------------------------------------------------------------------------------------------------------------------------------------------------------------------------------------------------------------|
|        | <p>populations"[tw] OR "under served world"[tw] OR "deprived country"[tw] OR "deprived countries"[tw] OR "deprived nation"[tw] OR "deprived nations"[tw] OR "deprived population"[tw] OR "deprived populations"[tw] OR "deprived world"[tw] OR "poor country"[tw] OR "poor countries"[tw] OR "poor nation"[tw] OR "poor nations"[tw] OR "poor population"[tw] OR "poor populations"[tw] OR "poor world"[tw] OR "poorer country"[tw] OR "poorer countries"[tw] OR "poorer nation"[tw] OR "poorer nations"[tw] OR "poorer population"[tw] OR "poorer populations"[tw] OR "poorer world"[tw] OR "developing economy"[tw] OR "developing economies"[tw] OR "less developed economy"[tw] OR "less developed economies"[tw] OR "lesser developed economy"[tw] OR "lesser developed economies"[tw] OR "under developed economy"[tw] OR "under developed economies"[tw] OR "underdeveloped economy"[tw] OR "underdeveloped economies"[tw] OR "middle income economy"[tw] OR "middle income economies"[tw] OR "low income economy"[tw] OR "low income economies"[tw] OR "lower income economy"[tw] OR "lower income economies"[tw] OR "low gdp"[tw] OR "low gnp"[tw] OR "low gross domestic"[tw] OR "low gross national"[tw] OR "lower gdp"[tw] OR "lower gnp"[tw] OR "lower gross domestic"[tw] OR "lower gross national"[tw] OR lmic[tw] OR lmic[tw] OR "third world"[tw] OR "lami country"[tw] OR "lami countries"[tw] OR "transitional country"[tw] OR "transitional countries"[tw])</p>                                                                                                                                                                                                                                                                                                                                                                                                                                                                                                                                                                                                                                         |
| #14    | <p>Search (Africa[tw] OR Asia[tw] OR Caribbean[tw] OR West Indies[tw] OR South America[tw] OR Latin America[tw] OR Central America[tw] OR Afghanistan[tw] OR Albania[tw] OR Algeria[tw] OR Angola[tw] OR Antigua[tw] OR Barbuda[tw] OR Argentina[tw] OR Armenia[tw] OR Armenian[tw] OR Aruba[tw] OR Azerbaijan[tw] OR Bahrain[tw] OR Bangladesh[tw] OR Barbados[tw] OR Benin[tw] OR Byelarus[tw] OR Byelorussian[tw] OR Belarus[tw] OR Belorussian[tw] OR Belorussia[tw] OR Belize[tw] OR Bhutan[tw] OR Bolivia[tw] OR Bosnia[tw] OR Herzegovina[tw] OR Hercegovina[tw] OR Botswana[tw] OR Brasil[tw] OR Brazil[tw] OR Bulgaria[tw] OR Burkina Faso[tw] OR Burkina Fasso[tw] OR Upper Volta[tw] OR Burundi[tw] OR Urundi[tw] OR Cambodia[tw] OR Khmer Republic[tw] OR Kampuchea[tw] OR Cameroon[tw] OR Cameroons[tw] OR Cameron[tw] OR Camerons[tw] OR Cape Verde[tw] OR Central African Republic[tw] OR Chad[tw] OR Chile[tw] OR China[tw] OR Colombia[tw] OR Comoros[tw] OR Comoro Islands[tw] OR Comores[tw] OR Mayotte[tw] OR Congo[tw] OR Zaire[tw] OR Costa Rica[tw] OR Cote d'Ivoire[tw] OR Ivory Coast[tw] OR Croatia[tw] OR Cuba[tw] OR Cyprus[tw] OR Czechoslovakia[tw] OR Czech Republic[tw] OR Slovakia[tw] OR Slovak Republic[tw] OR Djibouti[tw] OR French Somaliland[tw] OR Dominica[tw] OR Dominican Republic[tw] OR East Timor[tw] OR East Timur[tw] OR Timor Leste[tw] OR Ecuador[tw] OR Egypt[tw] OR United Arab Republic[tw] OR El Salvador[tw] OR Eritrea[tw] OR Estonia[tw] OR Ethiopia[tw] OR Fiji[tw] OR Gabon[tw] OR Gabonese Republic[tw] OR Gambia[tw] OR Gaza[tw] OR Georgia Republic[tw] OR Georgian Republic[tw] OR Ghana[tw] OR Gold Coast[tw] OR Greece[tw] OR Grenada[tw] OR Guatemala[tw] OR Guinea[tw] OR Guam[tw] OR Guiana[tw] OR Guyana[tw] OR Haiti[tw] OR Honduras[tw] OR Hungary[tw] OR India[tw] OR Maldives[tw] OR Indonesia[tw] OR Iran[tw] OR Iraq[tw] OR Isle of Man[tw] OR Jamaica[tw] OR Jordan[tw] OR Kazakhstan[tw] OR Kazakh[tw] OR Kenya[tw] OR Kiribati[tw] OR Korea[tw] OR Kosovo[tw] OR Kyrgyzstan[tw] OR Kirghizia[tw] OR Kyrgyz Republic[tw] OR Kirghiz[tw] OR</p> |

| Search | Query                                                                                                                                                                                                                                                                                                                                                                                                                                                                                                                                                                                                                                                                                                                                                                                                                                                                                                                                                                                                                                                                                                                                                                                                                                                                                                                                                                                                                                                                                                                                                                                                                                                                                                                                                                                                                                                                                                                                                                                                                                                                                                                                             |
|--------|---------------------------------------------------------------------------------------------------------------------------------------------------------------------------------------------------------------------------------------------------------------------------------------------------------------------------------------------------------------------------------------------------------------------------------------------------------------------------------------------------------------------------------------------------------------------------------------------------------------------------------------------------------------------------------------------------------------------------------------------------------------------------------------------------------------------------------------------------------------------------------------------------------------------------------------------------------------------------------------------------------------------------------------------------------------------------------------------------------------------------------------------------------------------------------------------------------------------------------------------------------------------------------------------------------------------------------------------------------------------------------------------------------------------------------------------------------------------------------------------------------------------------------------------------------------------------------------------------------------------------------------------------------------------------------------------------------------------------------------------------------------------------------------------------------------------------------------------------------------------------------------------------------------------------------------------------------------------------------------------------------------------------------------------------------------------------------------------------------------------------------------------------|
|        | Kirgizstan[tw] OR "Lao PDR"[tw] OR Laos[tw] OR Latvia[tw] OR Lebanon[tw] OR Lesotho[tw] OR Basutoland[tw] OR Liberia[tw] OR Libya[tw] OR Lithuania[tw])                                                                                                                                                                                                                                                                                                                                                                                                                                                                                                                                                                                                                                                                                                                                                                                                                                                                                                                                                                                                                                                                                                                                                                                                                                                                                                                                                                                                                                                                                                                                                                                                                                                                                                                                                                                                                                                                                                                                                                                           |
| #13    | Search (Macedonia[tw] OR Madagascar[tw] OR Malagasy Republic[tw] OR Malaysia[tw] OR Malaya[tw] OR Malay[tw] OR Sabah[tw] OR Sarawak[tw] OR Malawi[tw] OR Nyasaland[tw] OR Mali[tw] OR Malta[tw] OR Marshall Islands[tw] OR Mauritania[tw] OR Mauritius[tw] OR Agalega Islands[tw] OR Mexico[tw] OR Micronesia[tw] OR Middle East[tw] OR Moldova[tw] OR Moldovia[tw] OR Moldovian[tw] OR Mongolia[tw] OR Montenegro[tw] OR Morocco[tw] OR Ifni[tw] OR Mozambique[tw] OR Myanmar[tw] OR Myanma[tw] OR Burma[tw] OR Namibia[tw] OR Nepal[tw] OR Netherlands Antilles[tw] OR New Caledonia[tw] OR Nicaragua[tw] OR Niger[tw] OR Nigeria[tw] OR Northern Mariana Islands[tw] OR Oman[tw] OR Muscat[tw] OR Pakistan[tw] OR Palau[tw] OR Palestine[tw] OR Panama[tw] OR Paraguay[tw] OR Peru[tw] OR Philippines[tw] OR Philipines[tw] OR Phillipines[tw] OR Phillippines[tw] OR Poland[tw] OR Portugal[tw] OR Puerto Rico[tw] OR Romania[tw] OR Rumania[tw] OR Roumania[tw] OR Russia[tw] OR Russian[tw] OR Rwanda[tw] OR Ruanda[tw] OR Saint Kitts[tw] OR St Kitts[tw] OR Nevis[tw] OR Saint Lucia[tw] OR St Lucia[tw] OR Saint Vincent[tw] OR St Vincent[tw] OR Grenadines[tw] OR Samoa[tw] OR Samoan Islands[tw] OR Navigator Island[tw] OR Navigator Islands[tw] OR Sao Tome[tw] OR Saudi Arabia[tw] OR Senegal[tw] OR Serbia[tw] OR Montenegro[tw] OR Seychelles[tw] OR Sierra Leone[tw] OR Slovenia[tw] OR Sri Lanka[tw] OR Ceylon[tw] OR Solomon Islands[tw] OR Somalia[tw] OR Sudan[tw] OR Suriname[tw] OR Surinam[tw] OR Swaziland[tw] OR Syria[tw] OR Tajikistan[tw] OR Tadjhikistan[tw] OR Tadjikistan[tw] OR Tadjhik[tw] OR Tanzania[tw] OR Thailand[tw] OR Togo[tw] OR Togolese Republic[tw] OR Tonga[tw] OR Trinidad[tw] OR Tobago[tw] OR Tunisia[tw] OR Turkey[tw] OR Turkmenistan[tw] OR Turkmen[tw] OR Uganda[tw] OR Ukraine[tw] OR Uruguay[tw] OR USSR[tw] OR Soviet Union[tw] OR Union of Soviet Socialist Republics[tw] OR Uzbekistan[tw] OR Uzbek OR Vanuatu[tw] OR New Hebrides[tw] OR Venezuela[tw] OR Vietnam[tw] OR Viet Nam[tw] OR West Bank[tw] OR Yemen[tw] OR Yugoslavia[tw] OR Zambia[tw] OR Zimbabwe[tw] OR Rhodesia[tw]) |
| #12    | Search (Developing Countries[Mesh:noexp] OR Africa[Mesh:noexp] OR Africa, Northern[Mesh:noexp] OR Africa South of the Sahara[Mesh:noexp] OR Africa, Central[Mesh:noexp] OR Africa, Eastern[Mesh:noexp] OR Africa, Southern[Mesh:noexp] OR Africa, Western[Mesh:noexp] OR Asia[Mesh:noexp] OR Asia, Central[Mesh:noexp] OR Asia, Southeastern[Mesh:noexp] OR Asia, Western[Mesh:noexp] OR Caribbean Region[Mesh:noexp] OR West Indies[Mesh:noexp] OR South America[Mesh:noexp] OR Latin America[Mesh:noexp] OR Central America[Mesh:noexp] OR Afghanistan[Mesh:noexp] OR Albania[Mesh:noexp] OR Algeria[Mesh:noexp] OR American Samoa[Mesh:noexp] OR Angola[Mesh:noexp] OR "Antigua and Barbuda"[Mesh:noexp] OR Argentina[Mesh:noexp] OR Armenia[Mesh:noexp] OR Azerbaijan[Mesh:noexp] OR Bahrain[Mesh:noexp] OR Bangladesh[Mesh:noexp] OR Barbados[Mesh:noexp] OR Benin[Mesh:noexp] OR Byelarus[Mesh:noexp] OR Belize[Mesh:noexp] OR Bhutan[Mesh:noexp] OR Bolivia[Mesh:noexp] OR Bosnia-Herzegovina[Mesh:noexp] OR Botswana[Mesh:noexp] OR Brazil[Mesh:noexp] OR Bulgaria[Mesh:noexp] OR Burkina Faso[Mesh:noexp] OR Burundi[Mesh:noexp] OR Cambodia[Mesh:noexp]                                                                                                                                                                                                                                                                                                                                                                                                                                                                                                                                                                                                                                                                                                                                                                                                                                                                                                                                                                                 |

| Search | Query                                                                                                                                                                                                                                                                                                                                                                                                                                                                                                                                                                                                                                                                                                                                                                                                                                                                                                                                                                                                                                                                                                                                                                                                                                                                                                                                                                                                                                                                                                                                                                                                                                                                                                                                                                                                                                                                                                                                                                                                                                                                                                                                                                                                                                                                                                                                                                                                                                                                                                                                                                                                                                                                                                                                                                                                                                                                                                                                                                                                                                                                                                                                                                                                                                                                                                                                                                                                              |
|--------|--------------------------------------------------------------------------------------------------------------------------------------------------------------------------------------------------------------------------------------------------------------------------------------------------------------------------------------------------------------------------------------------------------------------------------------------------------------------------------------------------------------------------------------------------------------------------------------------------------------------------------------------------------------------------------------------------------------------------------------------------------------------------------------------------------------------------------------------------------------------------------------------------------------------------------------------------------------------------------------------------------------------------------------------------------------------------------------------------------------------------------------------------------------------------------------------------------------------------------------------------------------------------------------------------------------------------------------------------------------------------------------------------------------------------------------------------------------------------------------------------------------------------------------------------------------------------------------------------------------------------------------------------------------------------------------------------------------------------------------------------------------------------------------------------------------------------------------------------------------------------------------------------------------------------------------------------------------------------------------------------------------------------------------------------------------------------------------------------------------------------------------------------------------------------------------------------------------------------------------------------------------------------------------------------------------------------------------------------------------------------------------------------------------------------------------------------------------------------------------------------------------------------------------------------------------------------------------------------------------------------------------------------------------------------------------------------------------------------------------------------------------------------------------------------------------------------------------------------------------------------------------------------------------------------------------------------------------------------------------------------------------------------------------------------------------------------------------------------------------------------------------------------------------------------------------------------------------------------------------------------------------------------------------------------------------------------------------------------------------------------------------------------------------------|
|        | <p>OR Cameroon[Mesh:noexp] OR Cape Verde[Mesh:noexp] OR Central African Republic[Mesh:noexp] OR Chad[Mesh:noexp] OR Chile[Mesh:noexp] OR China[Mesh:noexp] OR Colombia[Mesh:noexp] OR Comoros[Mesh:noexp] OR Congo[Mesh:noexp] OR Costa Rica[Mesh:noexp] OR Cote d'Ivoire[Mesh:noexp] OR Croatia[Mesh:noexp] OR Cuba[Mesh:noexp] OR Cyprus[Mesh:noexp] OR Czechoslovakia[Mesh:noexp] OR Czech Republic[Mesh:noexp] OR Slovakia[Mesh:noexp] OR Djibouti[Mesh:noexp] OR "Democratic Republic of the Congo"[Mesh:noexp] OR Dominica[Mesh:noexp] OR Dominican Republic[Mesh:noexp] OR East Timor[Mesh:noexp] OR Ecuador[Mesh:noexp] OR Egypt[Mesh:noexp] OR El Salvador[Mesh:noexp] OR Eritrea[Mesh:noexp] OR Estonia[Mesh:noexp] OR Ethiopia[Mesh:noexp] OR Fiji[Mesh:noexp] OR Gabon[Mesh:noexp] OR Gambia[Mesh:noexp] OR "Georgia (Republic)"[Mesh:noexp] OR Ghana[Mesh:noexp] OR Greece[Mesh:noexp] OR Grenada[Mesh:noexp] OR Guatemala[Mesh:noexp] OR Guinea[Mesh:noexp] OR Guinea-Bissau[Mesh:noexp] OR Guam[Mesh:noexp] OR Guyana[Mesh:noexp] OR Haiti[Mesh:noexp] OR Honduras[Mesh:noexp] OR Hungary[Mesh:noexp] OR India[Mesh:noexp] OR Indonesia[Mesh:noexp] OR Iran[Mesh:noexp] OR Iraq[Mesh:noexp] OR Jamaica[Mesh:noexp] OR Jordan[Mesh:noexp] OR Kazakhstan[Mesh:noexp] OR Kenya[Mesh:noexp] OR Korea[Mesh:noexp] OR Kosovo[Mesh:noexp] OR Kyrgyzstan[Mesh:noexp] OR Laos[Mesh:noexp] OR Latvia[Mesh:noexp] OR Lebanon[Mesh:noexp] OR Lesotho[Mesh:noexp] OR Liberia[Mesh:noexp] OR Libya[Mesh:noexp] OR Lithuania[Mesh:noexp] OR Macedonia[Mesh:noexp] OR Madagascar[Mesh:noexp] OR Malaysia[Mesh:noexp] OR Malawi[Mesh:noexp] OR Mali[Mesh:noexp] OR Malta[Mesh:noexp] OR Mauritania[Mesh:noexp] OR Mauritius[Mesh:noexp] OR Mexico[Mesh:noexp] OR Micronesia[Mesh:noexp] OR Middle East[Mesh:noexp] OR Moldova[Mesh:noexp] OR Mongolia[Mesh:noexp] OR Montenegro[Mesh:noexp] OR Morocco[Mesh:noexp] OR Mozambique[Mesh:noexp] OR Myanmar[Mesh:noexp] OR Namibia[Mesh:noexp] OR Nepal[Mesh:noexp] OR Netherlands Antilles[Mesh:noexp] OR New Caledonia[Mesh:noexp] OR Nicaragua[Mesh:noexp] OR Niger[Mesh:noexp] OR Nigeria[Mesh:noexp] OR Oman[Mesh:noexp] OR Pakistan[Mesh:noexp] OR Palau[Mesh:noexp] OR Panama[Mesh:noexp] OR Papua New Guinea[Mesh:noexp] OR Paraguay[Mesh:noexp] OR Peru[Mesh:noexp] OR Philippines[Mesh:noexp] OR Poland[Mesh:noexp] OR Portugal[Mesh:noexp] OR Puerto Rico[Mesh:noexp] OR Romania[Mesh:noexp] OR Russia[Mesh:noexp] OR "Russia (Pre-1917)"[Mesh:noexp] OR Rwanda[Mesh:noexp] OR "Saint Kitts and Nevis"[Mesh:noexp] OR Saint Lucia[Mesh:noexp] OR "Saint Vincent and the Grenadines"[Mesh:noexp] OR Samoa[Mesh:noexp] OR Saudi Arabia[Mesh:noexp] OR Senegal[Mesh:noexp] OR Serbia[Mesh:noexp] OR Montenegro[Mesh:noexp] OR Seychelles[Mesh:noexp] OR Sierra Leone[Mesh:noexp] OR Slovenia[Mesh:noexp] OR Sri Lanka[Mesh:noexp] OR Somalia[Mesh:noexp] OR South Africa[Mesh:noexp] OR Sudan[Mesh:noexp] OR Suriname[Mesh:noexp] OR Swaziland[Mesh:noexp] OR Syria[Mesh:noexp] OR Tajikistan[Mesh:noexp] OR Tanzania[Mesh:noexp] OR Thailand[Mesh:noexp] OR Togo[Mesh:noexp] OR Tonga[Mesh:noexp] OR "Trinidad and Tobago"[Mesh:noexp] OR Tunisia[Mesh:noexp] OR Turkey[Mesh:noexp] OR Turkmenistan[Mesh:noexp] OR Uganda[Mesh:noexp] OR Ukraine[Mesh:noexp] OR Uruguay[Mesh:noexp] OR USSR[Mesh:noexp] OR Uzbekistan[Mesh:noexp] OR Vanuatu[Mesh:noexp] OR</p> |

| Search             | Query                                                                                                                                                                                                                                                                                                                                                                                                                                                                                                                                                                                                                                                                                                                         |
|--------------------|-------------------------------------------------------------------------------------------------------------------------------------------------------------------------------------------------------------------------------------------------------------------------------------------------------------------------------------------------------------------------------------------------------------------------------------------------------------------------------------------------------------------------------------------------------------------------------------------------------------------------------------------------------------------------------------------------------------------------------|
|                    | Venezuela[Mesh:noexp] OR Vietnam[Mesh:noexp] OR Yemen[Mesh:noexp] OR Yugoslavia[Mesh:noexp] OR Zambia[Mesh:noexp] OR Zimbabwe[Mesh:noexp])                                                                                                                                                                                                                                                                                                                                                                                                                                                                                                                                                                                    |
| #11                | Search (#9 OR #10)                                                                                                                                                                                                                                                                                                                                                                                                                                                                                                                                                                                                                                                                                                            |
| #10                | Search (qualitative OR ethno* OR phenomen* OR hermeneutic* OR "focus group*" OR "grounded theory" OR "narrative analys*" OR "lived experience*" OR "life experience*" OR "theoretical sampl*" OR purposive OR "thematic* analys*" OR "content analy*" OR "field note*" OR fieldnote* OR "field record*" OR "field stud*" OR "participant*" OR semi-structured OR semistructured OR unstructured OR in-depth OR indepth OR face-to-face OR "face to face" OR "structured categor*" OR "action research" OR audiorecord* OR taperecord* OR videorecord* OR videotap* OR audio-record* OR "audio record" OR tape-record* OR "tape record" OR video-record OR "video record" OR interview* OR "case stud*" OR "social construct") |
| <a href="#">#9</a> | Search (("Interviews as Topic"[Mesh] OR "Interview" [Publication Type]) OR "Qualitative Research"[Mesh] OR "Focus Groups"[Mesh])                                                                                                                                                                                                                                                                                                                                                                                                                                                                                                                                                                                              |
| <a href="#">#8</a> | Search (#5 OR #6 OR #7)                                                                                                                                                                                                                                                                                                                                                                                                                                                                                                                                                                                                                                                                                                       |
| <a href="#">#7</a> | Search (Search Retention OR retain* OR "lost to follow-up" OR ("loss*" AND "follow up") OR LTFU OR "loss-to-follow-up" OR attrition OR "loss to care" OR "loss to program*" OR default* OR engage* OR disengage* OR "retention in care" OR "lost to retention")                                                                                                                                                                                                                                                                                                                                                                                                                                                               |
| <a href="#">#6</a> | Search ("Treatment Adherence and Compliance"[Mesh] OR "Medication Adherence"[Mesh] OR "Patient Compliance"[Mesh])                                                                                                                                                                                                                                                                                                                                                                                                                                                                                                                                                                                                             |
| <a href="#">#5</a> | Search (Adherence OR adher* OR compliance OR complian* OR comply OR complied OR noncomplian* OR non-complian* OR non-adher* OR nonadher*)                                                                                                                                                                                                                                                                                                                                                                                                                                                                                                                                                                                     |
| <a href="#">#4</a> | Search (#1 OR #2 OR #3)                                                                                                                                                                                                                                                                                                                                                                                                                                                                                                                                                                                                                                                                                                       |
| <a href="#">#3</a> | Search ((Antiretroviral* OR ((anti) AND (retroviral*)) OR ARV* OR ART OR "antiretroviral therapy" OR HAART OR ((highly) AND (active) AND (antiretroviral*) AND (therap*)) OR ((anti) AND (hiv)) OR ((anti) AND (acquired immunodeficiency)) OR ((anti) AND (acquired immuno-deficiency)) OR ((anti) AND (acquired immune deficiency)) OR ((anti) AND (acquired immun*) AND (deficienc*))))                                                                                                                                                                                                                                                                                                                                    |
| <a href="#">#2</a> | Search ((antiretroviral agents [Mesh] OR antiretroviral therapy, highly active [Mesh]))                                                                                                                                                                                                                                                                                                                                                                                                                                                                                                                                                                                                                                       |
| <a href="#">#1</a> | Search (((((HIV OR hiv-1 OR hiv-2* OR hiv1 OR hiv2 OR hiv infect* OR human immunodeficiency virus OR human immune deficiency virus OR human immuno-deficiency virus OR human immune-deficiency virus OR ((human immun*) AND (deficiency virus)) OR acquired immunodeficiency syndromes OR acquired immune deficiency syndrome OR acquired immuno-deficiency syndrome OR acquired                                                                                                                                                                                                                                                                                                                                              |

| Search | Query                                                                                                                                    |
|--------|------------------------------------------------------------------------------------------------------------------------------------------|
|        | immune-deficiency syndrome OR ((acquired immun*) AND (deficiency syndrome)) OR HIV/AIDS)))) OR ((HIV infections [MeSH] OR HIV [MeSH])))) |



### Supplementary File 3: Characteristics of included studies

| Study ID                        | Country                      | Objective of the study                                                                                                                                                                                                                 | Participants and Perspectives                               | HIV Cascade         | Design and Data Collection Method                                          | Method of synthesis                               |
|---------------------------------|------------------------------|----------------------------------------------------------------------------------------------------------------------------------------------------------------------------------------------------------------------------------------|-------------------------------------------------------------|---------------------|----------------------------------------------------------------------------|---------------------------------------------------|
| <b>Abubakar 2016</b> (54)       | Kenya                        | To investigate the experiences and challenges of HIV infected adolescents at the Kenyan coast. Specifically set out to answer the following research question: What are the psychosocial challenges faced by HIV infected adolescents? | YLP HIV; Key informants: Caregivers, HCW, teachers          | Lived experience    | Qualitative: Individually administered IDI                                 | Framework analysis.                               |
| <b>Ashaba 2019</b> (43)         | Uganda                       | To understand adversities facing ALWH in rural Uganda and their effects on mental health                                                                                                                                               | YL HIV; Key informants: Caregivers.                         | Lived experience    | Qualitative: IDI and FGD                                                   | Thematic content analysis                         |
| <b>Bakeera-Kitaka 2008</b> (37) | Uganda                       | To assess sexual and reproductive health needs and problems, as well as determinants of sexual risk-taking among young people living with HIV aged 11-21 years attending the Paediatric Infectious Disease Clinic in Kampala, Uganda.  | YL HIV; Key informants: HCW                                 | Lived experience    | Grounded theory: FGD and brief anonymous self-administered questionnaires. | Grounded theory and comparative analysis          |
| <b>Bernays 2015</b> (79)        | Uganda and Zimbabwe          | To describe how children 11-13 years articulate 'living with' and 'growing up' with HIV and how this is shaped through their relationships with the adults around them.                                                                | YL HIV N=104; Key informants: HCW N=20 and Caregivers N= 40 | Lived experience    | Prospective qualitative: IDI, FGD and audio diaries.                       | Combined thematic and narrative analytic approach |
| <b>Bernays 2016</b> (77)        | Uganda, Harare, and Zimbabwe | To present data on young people living with HIVs' experiences of adherence post-disclosure and, especially, their motivations for missing treatment and avoiding seeking help in the clinic for adherence issues.                      | YL HIV N=130.                                               | Treatment adherence | Longitudinal qualitative: IDI                                              | Grounded analytic approach to thematic analysis.  |
| <b>Biadgilign 2009</b> (74)     | Ethiopia                     | To explore barriers and facilitators to antiretroviral medication adherence among HIV-infected paediatric patients.                                                                                                                    | Key informants: HCW N=14 and Caregivers N= 12               | Treatment adherence | Qualitative: IDI                                                           | Thematic content analysis                         |
| <b>Bikaako-Kajura 2006</b> (38) | Uganda                       | To describe contextual factors influencing adherence to daily drug regimens among paediatric and adolescent HIV/AIDS patients; to identify and describe barriers and facilitators of adherence; and                                    | YL HIV N=42; Key informants: Caregivers N= 42               | Treatment adherence | Qualitative: IDI                                                           | Thematic analysis                                 |

| Study ID                     | Country      | Objective of the study                                                                                                                                                                                                                                                                   | Participants and Perspectives                                        | HIV Cascade         | Design and Data Collection Method                                          | Method of synthesis                                  |
|------------------------------|--------------|------------------------------------------------------------------------------------------------------------------------------------------------------------------------------------------------------------------------------------------------------------------------------------------|----------------------------------------------------------------------|---------------------|----------------------------------------------------------------------------|------------------------------------------------------|
|                              |              | to identify relevant social support mechanisms that enhance drug adherence among children.                                                                                                                                                                                               |                                                                      |                     |                                                                            |                                                      |
| <b>Cluver 2015</b> (47)      | South Africa | To examine the associations between adolescent knowledge of HIV-positive status and ART-adherence. It also qualitatively examines adherence-relevant experiences amongst adolescents whose HIV-positive status has been disclosed to them, as well as healthcare workers and caregivers. | YPLHIV N=43; Key informants: Caregivers N= 25                        | Treatment adherence | Mixed methods: Questionnaires and interviews                               | Grounded analytic approach to thematic analysis      |
| <b>Cruz 2015</b> (144)       | Brazil       | To analyse primary socialisation of HIV-infected children and adolescents as a social process that shapes a new generation of stigmatised and vulnerable persons.                                                                                                                        | YPLHIV; Key informants: Caregivers (no sample size or demographics). | Lived experience    | Qualitative: Life history narrative: Interviews, FGD, and team field diary | Thematic content analysis (hermeneutic perspective). |
| <b>de Oliveira 2012</b> (69) | Brazil       | To understand the life projects of young adults living with HIV / AIDS infected through vertical transmission: how they deal with studies, work and building a family. To explore their experiences regarding health assistance received.                                                | YLP HIV N=16.                                                        | Lived experience    | Qualitative: Semi-structured interviews and sociodemographic questionnaire | Thematic analysis                                    |
| <b>Denison 2015</b> (70)     | Zambia       | To explore ART adherence from the perspectives and experiences of older ALHIV (aged 15 to 18) and their adult caregivers in Zambia.                                                                                                                                                      | YLP HIV N=32; Key informants: Caregivers N=23                        | Treatment adherence | Qualitative: IDI                                                           | Thematic analysis                                    |
| <b>Enane 2018</b> (4)        | Botswana     | To examine the full spectrum of missed opportunities for HIV care in those most vulnerable to poor outcomes.                                                                                                                                                                             | YLP HIV N=13; Key informants: Caregivers N= 15                       | ART cascade         | Qualitative: Interviews using semi-structured interview guides.            | Thematic analysis.                                   |
| <b>Enimil 2016</b> (10)      | Ghana        | To examine the challenges and protective factors for adolescents living with HIV within the sociocultural context of Ghana. Specific domains assessed included quality of life, physical/ medical health, psychological wellbeing, and social relationships.                             | YLP HIV N=20                                                         | Lived experience    | Mixed methods: IDI                                                         | Grounded Theory                                      |

| Study ID                      | Country                      | Objective of the study                                                                                                                                                                                                                                                                                                                                              | Participants and Perspectives                | HIV Cascade                                  | Design and Data Collection Method        | Method of synthesis                                               |
|-------------------------------|------------------------------|---------------------------------------------------------------------------------------------------------------------------------------------------------------------------------------------------------------------------------------------------------------------------------------------------------------------------------------------------------------------|----------------------------------------------|----------------------------------------------|------------------------------------------|-------------------------------------------------------------------|
| <b>Fetzer 2011</b> (75)       | Democratic Republic of Congo | To assess barriers and facilitators of ART adherence and the reported effects of child–caregiver relationships, psychosocial support structures, perceptions of living with HIV and of the concept of being “adherent” to medication. Assess specific adherence experiences among children and compared adult caregiver with child perceptions of adherence to ART. | YLPHIV N=20; Key informants: Caregivers N=20 | Treatment Adherence                          | Qualitative: IDI                         | Content analysis using inductive and deductive coding approaches. |
| <b>Gachanja 2015</b> (55)     | Kenya                        | To understand the lived experiences of HIV-positive parents and their children during the disclosure process in Kenya.                                                                                                                                                                                                                                              | YLPHIV N=7                                   | Disclosure of Status and Treatment Adherence | Phenomenology: IDI                       | Phenomenological thematic analysis                                |
| <b>Galano 2016</b> (67)       | Brazil                       | To explore the meanings attributed by young individuals about “living as an adolescent with HIV” in a group of patients that acquired the infection at birth and the elements involved with the adherence to antiretroviral treatment.                                                                                                                              | YLPHIV N=20                                  | Lived experience                             | Qualitative: IDI                         | Thematic analysis                                                 |
| <b>Gichane 2018</b> (64)      | Tanzania                     | To explore the role of caregivers in ART adherence support from the perspective of HIV-infected orphans in Tanzania to inform a mental health and adherence intervention designed specifically for ALHIV.                                                                                                                                                           | YLPHIV N=17                                  | Treatment adherence                          | Mixed methods: IDI                       | Thematic analysis                                                 |
| <b>Hodes 2019</b> (46)        | South Africa                 | To explore youth preferences for the multisensory components of medicine-taking.                                                                                                                                                                                                                                                                                    | YLPHIV N=27                                  | Treatment adherence                          | Qualitative-Participatory: IDI and FGD   | Thematic analysis                                                 |
| <b>Horns Schuh 2017</b> (145) | South Africa                 | To explore knowledge and experiences of adherence amongst adolescents and young adults attending treatment at the Perinatal HIV Research Unit (PHRU), Soweto, South Africa.                                                                                                                                                                                         | YLPHIV N=18                                  | Treatment adherence                          | Qualitative: Structured IDI and FGD      | Thematic analysis                                                 |
| <b>Inzaule 2016</b> (39)      | Uganda                       | To conceptualize the barriers and facilitators to long-term ART adherence in both adolescents and adults.                                                                                                                                                                                                                                                           | YLPHIV N=6; Key informants: HCW N=44         | Treatment adherence                          | Qualitative: Semi structured IDI and FGD | Framework synthesis using thematic coding.                        |

| Study ID                    | Country      | Objective of the study                                                                                                                                                                                                                                                                             | Participants and Perspectives                                        | HIV Cascade           | Design and Data Collection Method                             | Method of synthesis         |
|-----------------------------|--------------|----------------------------------------------------------------------------------------------------------------------------------------------------------------------------------------------------------------------------------------------------------------------------------------------------|----------------------------------------------------------------------|-----------------------|---------------------------------------------------------------|-----------------------------|
| <b>Kawuma 2014</b> (40)     | Uganda       | To describe how the experience of life-long HIV and ART interplays with everyday life for young adolescents within the different care environments such as the home, in the clinic and at school.                                                                                                  | YLPHIV N=26                                                          | Treatment adherence   | Qualitative: IDI                                              | Thematic content analysis   |
| <b>Kunaparedy 2014</b> (56) | Kenya        | To identify the key factors contributing to paediatric ART adherence in western Kenya from the perspective of perinatally infected adolescents.                                                                                                                                                    | YLPHIV N=23                                                          | Treatment adherence   | Qualitative: Semi structured IDI, FGD, and field notes        | Thematic analysis           |
| <b>Li 2010</b> (53)         | South Africa | To explore the experiences and needs of a group of adolescents living with HIV in Cape Town, South Africa.                                                                                                                                                                                         | YLPHIV N=16                                                          | Lived experience      | Qualitative: Semi-structured FGD                              | Thematic analysis           |
| <b>Loades 2018</b> (48)     | South Africa | To explore the lived experience of fatigue among a sample of South African adolescents receiving ART.                                                                                                                                                                                              | YLPHIV N=14                                                          | Treatment adherence   | Qualitative: IDI                                              | Thematic analysis           |
| <b>Luseno 2017</b> (57)     | Kenya        | To describe adolescents' experiences with HIV services at different stages of the care continuum: HIV testing, linkage to care, and retention in treatment.                                                                                                                                        | YLPHIV N=21; Key informants: Caregivers N=14                         | Linkage and retention | Qualitative: Semi-structured IDI                              | Thematic framework analysis |
| <b>MacCarthy 2018</b> (41)  | Uganda       | To explore barriers to ART adherence in Uganda among adolescents (age 14–17) and youth (age 18–24), from their own perspective, complemented with insight from community members and healthcare providers, to better understand what factors especially complicate ART adherence for these groups. | YLPHIV N=25; Key informants: HCW N=16, Community Advisory Board N=9. | Treatment adherence   | Qualitative: FGD                                              | Content analysis            |
| <b>Madiba 2019</b> (61)     | Botswana     | To assess the self-reported medication adherence among ALPHIV and explore structural factors that hinder or motivate adherence to ART.                                                                                                                                                             | YLPHIV N=30                                                          | Treatment adherence   | Phenomenology: IDI                                            | Thematic analysis           |
| <b>Marukutira 2012</b> (63) | Botswana     | To determine the factors that influence adherence to ART among adolescents who contracted HIV through vertical transmission.                                                                                                                                                                       | YLPHIV N=8                                                           | Treatment adherence   | Phenomenology: Semi-structured IDI                            | Thematic analysis           |
| <b>Mavhu 2013</b> (80)      | Zimbabwe     | To describe the internal and external life circumstances of YLPHIV and combine it with stakeholder input and literature about the determinants of adolescent HIV adherence to strengthen and expand AFRICAAID's programme.                                                                         | YLPHIV N=229; Key informants: HCW N=72                               | Treatment adherence   | Mixed methods: Survey, IDI, FGD, and life history narratives. | Thematic analysis           |

| Study ID                           | Country  | Objective of the study                                                                                                                                                                                                                                                                     | Participants and Perspectives                             | HIV Cascade                       | Design and Data Collection Method                                       | Method of synthesis                                                                |
|------------------------------------|----------|--------------------------------------------------------------------------------------------------------------------------------------------------------------------------------------------------------------------------------------------------------------------------------------------|-----------------------------------------------------------|-----------------------------------|-------------------------------------------------------------------------|------------------------------------------------------------------------------------|
| <b>Mburu 2014</b> (71)             | Zambia   | To examine the experiences of adolescents living with HIV in Kitwe, Kalomo and Lusaka in Zambia.                                                                                                                                                                                           | YLP HIV N=229; Key informants: HCW N=38, Caregivers n=21. | Lived experience                  | Qualitative: Semi-structured IDI and FGD                                | Narrative thematic framework analysis.                                             |
| <b>McHenry 2017</b> (58)           | Kenya    | The objective of the following study was to characterize how HIV-infected adolescents and their caregivers understood, experienced, and were impacted by HIV/AIDS-related (H/A) stigma as well as their perspectives on how to measure and intervene to reduce HIV stigma.                 | YLP HIV N=39; Key informants: Caregivers n=53.            | Lived experience                  | Qualitative: FGD                                                        | Deductive coding followed by constant comparison, axial coding, and triangulation. |
| <b>Mutumba 2015</b> (36)           | Uganda   | To identify the psychosocial challenges and coping strategies among perinatal HIV- infected adolescents in Uganda.                                                                                                                                                                         | YLP HIV N=38                                              | Lived experience                  | Phenomenology: Semi-structured IDI                                      | Thematic analysis                                                                  |
| <b>Mutwa 2013</b> (78)             | Rwanda   | To better understand combination ART adherence barriers and successes in adolescents in Rwanda, we conducted a qualitative study with perinatally HIV-infected adolescents and their primary caregivers.                                                                                   | YLP HIV N=42                                              | Treatment adherence               | Qualitative: IDI, FGD, and role-playing sessions.                       | Framework analysis and thematic analysis.                                          |
| <b>Nabukeera Barungi 2015</b> (42) | Uganda   | To describe the level and factors associated with adherence to antiretroviral therapy (ART) as well as the 1-year retention in care among adolescents in 10 representative districts in Uganda. In addition, explored the barriers and facilitators of adherence to ART among adolescents. | YLP HIV N=267; Key informants: Caregivers n=46.           | Treatment adherence and retention | Mixed methods convergent design: IDI, FGD, and Key informant interviews | Thematic analysis                                                                  |
| <b>Nestadt 2018</b> (146)          | Thailand | To qualitatively examine psychosocial needs and strengths of Thai PHIV+ adolescents and their families.                                                                                                                                                                                    | YLP HIV N=10; Key informants: HCW N=6, Caregivers n=8.    | Lived experience and adherence    | Qualitative: IDI and FGD                                                | Thematic framework analysis                                                        |
| <b>Nyogea 2015</b> (65)            | Tanzania | To explore the barriers and facilitators of adherence among children and teenagers in rural Tanzania.                                                                                                                                                                                      | YLP HIV N=36; Key informants: HCW N=2, Caregivers n=22.   | Treatment adherence               | Sequential explanatory mixed methods: Semi-structured IDI and FGD       | Thematic content analysis                                                          |

| Study ID                        | Country                 | Objective of the study                                                                                                                                                                                                                                                                                 | Participants and Perspectives                                              | HIV Cascade                            | Design and Data Collection Method                                                                     | Method of synthesis                                         |
|---------------------------------|-------------------------|--------------------------------------------------------------------------------------------------------------------------------------------------------------------------------------------------------------------------------------------------------------------------------------------------------|----------------------------------------------------------------------------|----------------------------------------|-------------------------------------------------------------------------------------------------------|-------------------------------------------------------------|
| <b>Petersen 2010</b> (147)      | South Africa            | To examine the psychosocial challenges and protective factors for adolescents and their caregivers affected by paediatric HIV within the socio-cultural context of South Africa with the aim of using the data to inform mental health promotion and HIV prevention interventions for this population. | YLP HIV N=25; Key informants: Caregivers n=15.                             | Lived experience                       | Qualitative: Individual in-depth interviews                                                           | Thematic analysis                                           |
| <b>Pinzon-Iregui 2017</b> (148) | Dominican Republic (DR) | To characterize the Dominican Republic transition (to adult HIV care) experience for youth with perinatal infections of HIV.                                                                                                                                                                           | YLP HIV N=15; Key Informants: Caregivers N=7, HCW N=7                      | Transition to adult care and Adherence | Phenomenology: FGD                                                                                    | Grounded theory and phenomenology                           |
| <b>Ramaiya 2016</b> (66)        | Tanzania                | To identify salient psychosocial and mental health challenges confronted by HIV-positive youth in a resource-poor Tanzanian setting.                                                                                                                                                                   | YLP HIV N=24                                                               | Lived experience                       | Mixed methods: Semi-structured IDI                                                                    | Thematic analysis                                           |
| <b>Ritchwood 2020</b> (149)     | South Africa            | To identify clinic related facilitators and barriers to treatment retention and adherence among adolescents living with HIV in Cape Town, South Africa.                                                                                                                                                | YLP HIV N=20; Key Informants: Caregivers N=19, community stakeholders N=20 | Adherence and Retention                | Qualitative: IDI                                                                                      | Thematic analysis                                           |
| <b>Rosenbaum 2017</b> (50)      | South Africa            | To develop a cultural understanding of how young people living with HIV in the Katlehong township in the Gauteng province of South Africa effectively cope with the adversities that they face and the social ecological resources that contribute to their well-being and resilience.                 | YLP HIV N=7; Key Informants: Caregivers N=7, mental health providers N=3   | Lived experience                       | Transformative concurrent mixed methods design: Photovoice, FGD, photo exhibition, and questionnaire. | Thematic analysis                                           |
| <b>Siu 2016</b> (150)           | Uganda                  | To describe how, when, and with whom HIV testing and treatment decisions are made and the role of young people themselves in these endeavours.                                                                                                                                                         | YL HIV N=20                                                                | Testing, Linkage, and Adherence        | Qualitative: IDI                                                                                      | Thematic content analysis                                   |
| <b>Vreeman 2009</b> (60)        | Kenya                   | To identify key factors contributing to paediatric ART adherence and to derive a culturally specific framework that describes paediatric ART adherence from the lived experiences of participants in this resource-limited setting.                                                                    | Key Informants: Caregivers N=85 and other key informants n=35.             | Treatment adherence                    | Qualitative: Key informant interviews and FGD                                                         | Grounded theory approach with constant comparative analysis |



#### Supplementary File 4: Summary of methodological quality assessment

|                     | 1. Was there a clear statement of the aims of the research? | 2. Is a qualitative methodology appropriate? | 3. Was the research design appropriate to address the aims of the research? | 4. Was the recruitment strategy appropriate to the aims of the research? | 5. Was the data collected in a way that addressed the research issue? | 6. Has the relationship between researcher and participants been considered? | 7. Have ethical issues been taken into consideration? | 8. Was the data analysis sufficiently rigorous? | 9. Is there a clear statement of findings? | 10. How valuable is the research? |
|---------------------|-------------------------------------------------------------|----------------------------------------------|-----------------------------------------------------------------------------|--------------------------------------------------------------------------|-----------------------------------------------------------------------|------------------------------------------------------------------------------|-------------------------------------------------------|-------------------------------------------------|--------------------------------------------|-----------------------------------|
| Abubakar 2016       | Y                                                           | Y                                            | Y                                                                           | ?                                                                        | Y                                                                     | N                                                                            | Y                                                     | Y                                               | Y                                          | Y                                 |
| Ashaba 2019         | Y                                                           | Y                                            | Y                                                                           | Y                                                                        | Y                                                                     | Y                                                                            | Y                                                     | Y                                               | Y                                          | Y                                 |
| Bakeera-Kitaka 2008 | Y                                                           | Y                                            | Y                                                                           | Y                                                                        | Y                                                                     | N                                                                            | ?                                                     | Y                                               | Y                                          | Y                                 |
| Bernays 2015        | Y                                                           | Y                                            | Y                                                                           | Y                                                                        | Y                                                                     | Y                                                                            | Y                                                     | Y                                               | Y                                          | Y                                 |
| Bernays 2016        | Y                                                           | Y                                            | Y                                                                           | Y                                                                        | Y                                                                     | Y                                                                            | Y                                                     | Y                                               | Y                                          | Y                                 |
| Biadgilign 2009     | Y                                                           | Y                                            | Y                                                                           | Y                                                                        | Y                                                                     | ?                                                                            | Y                                                     | Y                                               | Y                                          | Y                                 |
| Bikaako 2006        | Y                                                           | Y                                            | Y                                                                           | Y                                                                        | Y                                                                     | ?                                                                            | Y                                                     | Y                                               | Y                                          | Y                                 |



|                     |   |   |   |   |   |   |   |   |   |   |
|---------------------|---|---|---|---|---|---|---|---|---|---|
| Cluver 2015         | Y | Y | Y | Y | Y | ? | Y | N | N | Y |
| Cruz 2015           | Y | Y | Y | N | ? | N | Y | N | Y | Y |
| De Oliveira<br>2012 | Y | Y | Y | Y | Y | Y | Y | N | Y | Y |
| Denison<br>2015     | Y | Y | Y | Y | Y | Y | Y | Y | Y | Y |
| Enane 2018          | Y | Y | Y | Y | Y | Y | Y | Y | Y | Y |
| Enimil 2016         | Y | Y | ? | Y | Y | ? | ? | N | Y | Y |
| Fetzer 2011         | Y | Y | Y | Y | Y | Y | Y | Y | Y | Y |
| Gachanja<br>2015    | Y | Y | Y | Y | Y | N | Y | Y | Y | Y |
| Galano<br>2016      | Y | Y | Y | Y | Y | ? | Y | Y | Y | Y |
| Gichane<br>2018     | Y | Y | Y | Y | Y | N | Y | Y | Y | Y |
| Hodes 2019          | Y | Y | Y | Y | Y | Y | Y | Y | Y | Y |
| Hornschuh<br>2017   | Y | Y | Y | Y | Y | Y | Y | Y | Y | Y |
| Inzaule<br>2016     | Y | Y | Y | Y | Y | N | Y | Y | Y | Y |

|                      |   |   |   |   |   |   |   |   |   |   |
|----------------------|---|---|---|---|---|---|---|---|---|---|
| Kawuma<br>2014       | Y | Y | Y | Y | Y | N | Y | Y | Y | Y |
| Kunapared<br>dy 2014 | Y | Y | Y | Y | Y | ? | Y | Y | Y | Y |
| Li 2010              | Y | Y | Y | Y | Y | N | Y | Y | Y | Y |
| Loades<br>2018       | Y | Y | ? | ? | Y | N | Y | ? | Y | Y |
| Luseno<br>2017       | Y | Y | Y | Y | Y | N | Y | Y | Y | Y |
| MacCarthy<br>2018    | Y | Y | Y | Y | Y | N | Y | Y | Y | Y |
| Madiba<br>2019       | Y | Y | Y | Y | Y | Y | Y | Y | Y | Y |
| Marukutira<br>2012   | Y | Y | Y | Y | Y | Y | Y | Y | Y | Y |
| Mavhu<br>2013        | Y | Y | Y | Y | Y | Y | Y | Y | Y | Y |
| Mburu<br>2014        | Y | Y | Y | Y | Y | Y | Y | Y | Y | Y |
| McHenry<br>2017      | Y | Y | Y | Y | Y | N | Y | Y | Y | Y |
| Mutumba<br>2015      | Y | Y | Y | Y | Y | N | Y | Y | Y | Y |
| Mutwa<br>2013        | Y | Y | Y | Y | Y | N | Y | Y | Y | Y |

|                        |   |   |   |   |   |   |   |   |   |   |
|------------------------|---|---|---|---|---|---|---|---|---|---|
| Nabukeera-Barungi 2015 | Y | Y | Y | Y | Y | N | Y | Y | Y | Y |
| Nestadt 2018           | Y | Y | Y | ? | Y | N | Y | Y | Y | Y |
| Nyogea 2015            | Y | Y | Y | Y | Y | N | Y | Y | Y | Y |
| Peterson 2010          | Y | Y | Y | ? | Y | N | Y | Y | Y | Y |
| Pinzón-Iregui 2017     | Y | Y | Y | Y | Y | ? | Y | Y | Y | Y |
| Ramaiya 2016           | Y | Y | Y | Y | Y | N | Y | Y | Y | Y |
| Ritchwood 2020         | Y | Y | Y | Y | Y | N | Y | Y | Y | Y |
| Rosenbaum 2017         | Y | Y | Y | Y | Y | Y | Y | Y | Y | Y |
| Siu 2016               | Y | Y | Y | Y | Y | N | Y | Y | Y | Y |
| Vreeman 2009           | Y | Y | Y | Y | Y | N | Y | Y | Y | Y |
| Vreeman 2010           | Y | Y | Y | Y | Y | N | Y | Y | Y | Y |
| Woollett 2017          | Y | Y | Y | Y | Y | N | Y | Y | Y | Y |
| Xu 2017                | Y | Y | Y | Y | Y | Y | Y | Y | Y | Y |
| Yang 2017              | Y | Y | Y | Y | Y | N | Y | Y | Y | Y |
